**Title:** Critical interventions for demand generation in Zambia, Nepal, and Senegal with regards to the 5C psychological antecedents of vaccination

**Authors:** Kyra A Hester<sup>a</sup>, Zoe Sakas<sup>a</sup>, Emily Awino Ogutu<sup>a</sup>, Sameer Dixit<sup>b</sup>, Anna S. Ellis<sup>a</sup>, Chenmua Yang<sup>a</sup>, Chama Chanda<sup>c</sup>, Matthew C. Freeman<sup>a</sup>, Walter A. Orenstein<sup>d</sup>, Moussa Sarr<sup>e</sup>, Robert A. Bednarczyk<sup>a</sup>

**Affiliations:**

<sup>a</sup> Rollins School of Public Health, Emory University, Atlanta, GA, USA

<sup>b</sup> Center for Molecular Dynamics Nepal, Katmandu, Nepal

<sup>c</sup> Center for Family Health Research in Zambia, Lusaka, Zambia

<sup>d</sup> Emory University School of Medicine, Emory University, Atlanta, GA, USA

<sup>e</sup> Institut de Recherche en Santé de Surveillance Epidémiologique et de Formation (IRESSEF), Dakar, Senegal

\* Correspondence to [robert.a.bednarczyk@emory.edu](mailto:robert.a.bednarczyk@emory.edu); (404) 727 - 9713; 1518 Clifton Road NE, Atlanta, GA, 30322

**Author emails:** [kyra.alexandra.hester@emory.edu](mailto:kyra.alexandra.hester@emory.edu); [zmsakas@gmail.com](mailto:zmsakas@gmail.com); [emily.ogutu@emory.edu](mailto:emily.ogutu@emory.edu); [s.dixit@cmdn.org](mailto:s.dixit@cmdn.org); [anna.s.ellis@emory.edu](mailto:anna.s.ellis@emory.edu); [chenmua.yang@emory.edu](mailto:chenmua.yang@emory.edu); [chamachanda75@gmail.com](mailto:chamachanda75@gmail.com); [matthew.freeman@emory.edu](mailto:matthew.freeman@emory.edu); [worenst@emory.edu](mailto:worenst@emory.edu); [moussa.sarr@iressef.org](mailto:moussa.sarr@iressef.org); [robert.a.bednarczyk@emory.edu](mailto:robert.a.bednarczyk@emory.edu)

**Contributions:** KAH, ASE, SD, MCF, WO, MS, RAB: project conceptualization and methodology; KAH, ZS, ASE, CC, MCF, WO, MS, RAB: investigation and data curation; KAH, ZS, ASE, EAO, CY, CC, MCF, WO, MS, RAB: formal analysis; KAH, ZS, EAO, ASE, CY: writing - original; KAH, ZS, EAO, ASE, CY, CC, MCF, WO, MS, RAB: writing – review and editing; all authors provided approval of the submitted version.

## **Abstract**

### **Introduction**

Childhood vaccination is an effective intervention for lowering the burden of infectious disease. Progress was made to increase coverage globally, but vaccine hesitancy and refusal has threatened to erode said increases. The 5C psychological antecedents of vaccination (“5C”) model provides a validated measure of “vaccine hesitancy or confidence” to assess individual thoughts and behaviors behind vaccination. Our purpose was to investigate population-level factors that contributed to high and sustained vaccination coverage via interventions in Zambia, Nepal, and Senegal, and alignment with the 5Cs.

### **Methods**

FDGs and KIIs were collected at the national, regional, district, health facility, and community levels. We assessed the demand environment, as relayed by participants, and identified interventions that key informants reported as successful for demand generation, then retroactively aligned the interventions with the 5C constructs.

### **Results**

Demand was positively correlated with high *confidence* and *collective responsibility*. Psychological *constraints* sometimes impacted demand. Physical *constraints* created barriers in some communities, particularly difficult to access (i.e., mountainous). Occasionally, physical *constraints* did not affect vaccination behavior - parents believed the benefits of vaccination worth pursuing. Factors negatively correlated with demand and intent, *complacency* and *calculation*, had limited impact. The most critical interventions were: targeted and tailored health education activities (i.e., media partnerships, school outreach); community engagement; community ownership; and involvement of community (i.e., community health workers, leaders, religious figures).

### **Conclusion**

We found similar interventions were used to generate demand, and those strategies aligned with the 5C constructs. Categorizing interventions by drivers of demand may help strategic planning and the division of resources; decision makers may choose to implement our suggested interventions. Assessing the 5Cs allows for decision-makers to operationalize demand generation into concrete interventions and policies, and determine the individual impact of these constructs on the population and focus efforts on interventions tailored to a specific need.

1 **Title:** Critical interventions for demand generation in Zambia, Nepal, and Senegal with regards  
2 to the 5C psychological antecedents of vaccination

3

#### 4 **1. Introduction**

5 Reaching – and maintaining- high childhood vaccination coverage is one of the most cost-  
6 effective interventions to lower the burden of infectious disease. Globally, we have made  
7 progress toward increasing vaccine coverage; the third dose of diphtheria, tetanus, and pertussis  
8 (DTP3) vaccine among WHO member states increased from 72% in 2000 to 83% in 2020, but  
9 gaps remain [1-3]. Structural changes have been implemented to increase vaccination rates (e.g.,  
10 cold chain expansion), but to ensure effective vaccine delivery, there needs to be active intent to  
11 vaccinate in addition to demand generation efforts by immunization programs.

12

13 Vaccine hesitancy and refusal to vaccinate has threatened to erode the gains in coverage [4, 5]. A  
14 2013 survey of 13 immunization program managers from the 6 WHO Regions found that  
15 hesitancy was present across all countries; however, the impact of hesitancy on uptake varied by  
16 country-specific context [6]. The Strategic Advisory Group of Experts (SAGE) reviewed these  
17 findings, and determined that of countries implementing interventions to address hesitancy,  
18 “dialogue-based, directly targeted approaches can improve vaccine uptake, including engaging  
19 leaders, social mobilization, mass media, improving convenience, reminders, training for  
20 health-care workers, and increasing awareness”. Vaccine education for children was considered  
21 an area for further exploration [6].

22

23 The 5C psychological antecedents of vaccination (“5C”) model provides a validated measure of  
24 “vaccine hesitancy or confidence” that is used to assess individual thoughts and behaviors  
25 behind vaccination [7]. The five components of the 5C model include *confidence*, *complacency*,

26 *constraints, calculation, and collective responsibility*, and is adapted from the SAGE Working  
27 Group on Vaccine Hesitancy's original 3C model [5]. The scale was validated through two  
28 studies; one to correlate psychological constructs with the scale, the other to correlate the scale  
29 with vaccination behavior. The resulting scale statistically correlates to vaccination behavior,  
30 and was predictive of future intent to vaccinate [5]. This model is considered ideal for assessing  
31 vaccination behavior [7-10].

32  
33 The 5C model was developed with the intent to measure individual level behavior; it is currently  
34 unknown how this scale translates to community-level perceptions and activities, including how  
35 the government, programmatic, and community behaviors affect vaccination decision-making.  
36 Understanding the role of vaccine hesitancy at large may provide insight on the performance of  
37 demand generation activities. The purpose of this study was to review interventions that key  
38 informant interviewers (KIIs) attributed to increased vaccine uptake in Zambia, Nepal, and  
39 Senegal, and assess how these interventions affected the community vaccination behaviors as  
40 seen on the 5C model. We observed innovative approaches to generating demand as part of our  
41 research in Zambia, Nepal, and Senegal [11-13]. Interventions were often implemented from  
42 existing global guidelines and further refined to country context [14]. These interventions  
43 ultimately utilized constructs seen in the 5C model, and may be useful to other low- and middle-  
44 income countries (LICs and LMICs, respectively) within similar contexts to address challenges  
45 in vaccine uptake.

46

## 47 **2. Methods**

48 This multiple case study analysis was conducted using data from the Exemplars in Vaccine  
49 Delivery project within the Exemplars in Global Health program [15, 16]. We employed a  
50 qualitative analysis to investigate factors that contributed to high and sustained vaccination

51 coverage through KIIs and focus group discussions (FGDs) at the national, regional, district,  
52 health facility, and community levels. We triangulated these findings with quantitative analyses  
53 using publicly available data.

54  
55 Prior to data collection, we developed a conceptual model (Figure 1) to organize factors that  
56 impact childhood vaccine coverage globally. This model was based on the work of Phillips et al.  
57 and LaFond et al. alongside a broader review of the vaccine literature [17, 18]. While components  
58 of vaccine demand and intent are present in this model, we sought the use of the 5C model to  
59 further assess demand in our selected countries. The protocol of the primary analysis, along with  
60 individual case studies of exemplar countries and a synthesis case study are published separately  
61 [11-13, 15].

## 62 **2.1 Study Sites**

63 Methods for country, region, and district selection are detailed elsewhere [11-13, 15]. Countries  
64 were selected based on DTP1 and DTP3 coverage estimates, which served as proxies for the  
65 evaluation of the vaccine delivery system in these countries, with DTP1 as a proxy of access and  
66 DTP3 as a proxy of continued utilization of immunization services (Figure 2) [15, 19]. Three  
67 regions within each country were identified in consultation with national stakeholders and  
68 available data (Table 2). Ministry of Health\* officials facilitated site selection and data collection  
69 activities

## 70 **2.2 Qualitative Data collection and analysis**

71 Qualitative data were collected between October 2019 and April 2021 at the national, regional,  
72 district, health facility, and community levels in Nepal, Senegal, and Zambia (Table 3). Interview  
73 guides were informed by the Consolidated Framework for Implementation Research (CFIR) and  
74 the Context and Implementation of Complex Interventions (CICI) frameworks [20]. KII and FGD

---

\* Note that each country has a slightly different name for their Ministry of Health (e.g., Ministry of Health and Population in Nepal; Ministry of Health and Social Action in Senegal), but all will be referred to as "MoH" throughout for simplicity.

75 guides were translated into local languages by research assistants. All interview guides were  
76 piloted before use and adjusted iteratively throughout data collection. An initial list of KIIs was  
77 developed with local research partners and MoH officials; snowball sampling was used to identify  
78 additional key informants. Our sampling approach included a diverse sample of participants in  
79 regard to geographic location and demographic qualities. Caregivers and volunteer community  
80 health workers (CHWs) were recruited for FGDs from health facility catchment areas with the  
81 assistance of local health staff. The duration of KIIs and FGDs averaged one and a half hours. KIIs  
82 and FGDs were audio-recorded with the permission of participants. Research files, recordings,  
83 and transcriptions were de-identified and password protected. We applied a theory-informed  
84 thematic analysis of the transcripts to identify critical success factors. Transcripts were coded and  
85 analyzed using MaxQDA2020 software (Berlin, Germany). Qualitative data collection and  
86 analysis tools, including topic guides and codebooks, can be found on our Open Sciences  
87 Framework (OSF) page [21].

### 88 **2.3. Application of the 5C model**

89 We analyzed qualitative data from Nepal, Senegal, and Zambia and pulled data coded with *public*  
90 *awareness, community engagement, media, or vaccine hesitancy*. We first assessed the current  
91 demand environment as relayed by KIIs and FGDs. Next, we identified interventions reported as  
92 most successful for demand generation and retroactively aligned the interventions with the  
93 constructs on the 5C model.

### 94 **2.4. Ethical approvals**

95 This study was considered exempt by the Institutional Review Board committee of Emory  
96 University, Atlanta, Georgia, USA (IRB00111474), and was approved by the Nepal Health  
97 Research Council (NHRC; Reg. no. 347/2019) in Kathmandu, Nepal; the National Ethical  
98 Committee for Health Research (CERNS; Comité National d’Ethique pour la Recherche en Santé)  
99 in Dakar, Senegal (00000174); the University of Zambia Biomedical Research Ethics Committee

100 (Federal Assurance No. FWA00000338, REF. No. 166-2019); and the National Health Research  
101 Authority in Zambia. All participants provided written informed consent.

102

### 103 **3. Results**

104 We found that the 5C's were an effective way to analyze intent and demand generation within our  
105 studied populations in Nepal, Senegal, and Zambia. Similar interventions across countries were  
106 used to generate demand, and these interventions ultimately aligned with all constructs of the 5c  
107 model (Table 4). Key informants from all three countries reported high levels of intent to vaccinate  
108 and demand for vaccines among their communities. Demand was positively correlated with high  
109 *confidence* and *collective responsibility*. Psychological *constraints* sometimes impacted demand  
110 for vaccine, hindering uptake. Physical *constraints* were barriers in some communities,  
111 particularly in those that were difficult to access (i.e., rural or mountainous communities).  
112 Occasionally, physical *constraints* did not affect vaccination behavior - parents believed the  
113 benefits of vaccination to be worth pursuing despite difficulties. Factors often negatively  
114 correlated with vaccine intent, such as *complacency* and *calculation*, were limited in impact in  
115 these three countries. Through interventions targeting health education and community  
116 ownership, the exemplar countries addressed community vaccination behavior within all  
117 constructs.

#### 118 **3.1. Targeted and tailored health education activities**

119 In all three countries, the MoH utilized existing channels – including media and schools - to  
120 disseminate factual information regarding vaccines. These targeted health education  
121 interventions aligned with each construct in the 5C model. *Confidence* in vaccines was fostered  
122 through dissemination of accurate and timely information from trusted sources, and raised the  
123 awareness of vaccine benefits. *Collective responsibility* was maintained by filtering vaccination  
124 messaging through societal norms and cultural ties. *Complacency* was addressed by education of  
125 parents and children on immunization and danger of infectious disease. The MoH addressed



126 psychological *constraints* by providing media with tools to address misinformation and hesitancy  
127 along with information about upcoming vaccination events. *Calculation* was dissuaded by media  
128 and government transparency along with easy access to accurate information (Table 4).

### 129 ***Media partnerships***

130 The MoH in Zambia, Nepal, and Senegal played an active role in engaging with the media for  
131 dissemination of vaccination information via strategic partnerships with media organizations and  
132 outlets. Within the MoH in all three countries, there were designated governmental agencies that  
133 handled media engagement. In Nepal, the National Health Education Information and  
134 Communication Center was responsible for providing media agencies with information for  
135 message development and verified or corrected information as needed. In Zambia, the  
136 Department of Health Promotions, Environmental Health, and Social Determinants provided the  
137 media with discussion points and scripts on new vaccine introductions, immunization campaigns,  
138 and general vaccinations. All countries had subnational offices for more tailored media  
139 dissemination; health workers at municipality levels referenced agreements between the  
140 community and media outlets (e.g., radio stations, TV, newspapers) to promote childhood  
141 vaccines and regularly announce routine vaccine days. National and local radio stations in Zambia  
142 provided free time slots for health messaging, and district and provincial health officers will go on  
143 air to discuss immunization activities.

144  
145 In Senegal, the National Health Education and Information Service sits within the MoH and  
146 develops materials for health education nationally. The Association of Journalists for Health  
147 (L'Association des journalistes en santé, population et développement; AJSP) is an independent  
148 group of media experts that focuses on topics within the health and development sectors.  
149 According to key informants, the AJSP developed a “strategic partnership” with the MoH at the  
150 national level, and was composed of members from radio, TV, written press, and online media.

151 The primary role of the AJSP was to ensure that accurate information about vaccines was  
152 disseminated to the public through multiple channels.

153  
154 Countries utilized these partnerships to disseminate accurate information to communities,  
155 ultimately fostering trust in both the government and vaccines. At the local level, information was  
156 shared a variety of ways - radio being the most prevalent. Each country had unique modalities for  
157 media dissemination, such as an online news portal (Nepal), peer-to-peer learning from recorded  
158 visits (Zambia), and press caravans - defined as small scale campaigns (Senegal).

159  
160 *“They ... deliver good messages to us. The information on the immunization month is*  
161 *discussed in every media like radio, local and national newspaper, online news portal,*  
162 *print, and by every level of the government. In case the regular program is delayed or*  
163 *not running, then they used to bring out these things in the media. So, the media has a*  
164 *positive role.” (District health official, Nepal)*

### 165 **School outreach**

166 The education systems in these countries were used to promote vaccination among children –  
167 either directly or indirectly. In Zambia, completed under-five cards - vaccination cards given at  
168 birth for recording vaccination status - were necessary in many communities for enrolling  
169 children in schools or registering for final exams. Although these requirements were not  
170 consistent, informants did report that under five cards fostered intent to vaccinate among parents.  
171 Schools hosted immunization weeks for children to catch-up on vaccinations, and teachers would  
172 provide immunization information to both parents and children.

173  
174 Senegal and Nepal directly educated children on disease and vaccines. In both countries, the  
175 Ministry of Education (MoE) and MoH worked together to develop health education curriculums.  
176 The MoH in Senegal has collaborated with the MoE since the 1980s, and they produced courses

177 on health and immunization for teachers, who share this information with school children as part  
178 of the National Education Program.

179  
180 *“In the initial teachers’ training, there is a module on immunization in the curriculum.*  
181 *There are courses that are given to explain [immunization]. That is why we ask the*  
182 *Ministry of Education to include their concerns about any health program in the*  
183 *curriculum in order to get the teachers to consider them as part of the teaching program.*  
184 *Malaria, for example, is part of the teaching program - as is vaccination. It is an aspect*  
185 *taken into account during the teacher’s evaluation.” (National health official, Senegal)*

186  
187 In Nepal, the MoE and MoH collaborated through a formal partnership since 1971, when health  
188 was made a compulsory subject for all grade levels. The MoE developed a standard curriculum to  
189 influence the health knowledge, attitudes, and practices of students grades 1 -10, taught to  
190 teachers during their training; only health workers approved by the MoHP could teach the topic  
191 [22, 23]. Teachers would educate their students about the date and place of immunization  
192 sessions in their communities, and would check the immunization status of at-risk populations.

193  
194 *“Yes, we have been doing school health programs. We have organized health-related*  
195 *topics in the curriculum of the education system while organizing health related*  
196 *programs and promoting good health behavior. We have organized training for*  
197 *students, teachers, the community and are reaching the community through school*  
198 *children. We organize these programs not only in terms of immunization, but all health-*  
199 *related programs and outbreak management. We made the format. This format has*  
200 *helped other health-related programs as well. We provide regular trainings and*  
201 *education every year.” (Regional health official, Nepal)*

202

203 **3.2. Community engagement and ownership of health interventions and outcomes**

204 Across all sites, respondents spoke to the importance of community actors for the implementation  
205 of demand generation activities – including their input on messaging and support for outreach.  
206 The MoH leveraged partnerships with community leaders, religious leaders, traditional leaders,  
207 and CHWs to increase vaccine demand and uptake. Interventions related to community  
208 ownership also aligned with the other antecedents for demand, by creating *confidence* in vaccines  
209 and service providers through the existing respect and trust of volunteer CHWs; addressing  
210 psychological *constraints* through tailored activities to local areas and individualized outreach to  
211 parents; addressing *complacency* by increasing public awareness through community channels;  
212 and limiting the impact of *calculation* through proactive engagement with community members  
213 and dissemination of accurate information (Table 4).

214 **Community health workers**

215 CHWs were influential players within the healthcare systems of Zambia, Nepal, and Senegal. In  
216 Nepal, Female Community Health Volunteers (FCHVs) were the main sources of vaccination  
217 information in communities. FCHVs are recruited to work in their own communities and utilize  
218 knowledge of community values, norms, and priorities to adjust messaging and personal  
219 communication to address the needs of specific groups. FCHVs ensure community members are  
220 knowledgeable of their right to receive vaccines and engage directly through door-to-door  
221 education. FCHV vaccine messaging has changed over time along with the needs of the  
222 community; initially, FCHVs informed parents to bring their children to vaccination days, without  
223 explaining why vaccinations are important. In recent years, FCHVs have focused more on  
224 thorough health education, including other long-term benefits of vaccines that impact quality of  
225 life.

226

227 *“Previously, the people were only informed to bring their children for vaccination, but*  
228 *now we say why it is important to vaccinate. When they ask we link it with financial*

229 *things and also say the investment must be done in health.” (District health official,*  
230 *Nepal)*

231  
232 In Zambia and Senegal, CHWs provided tailored messaging to communities to encourage and  
233 reinforce vaccination. In Senegal, CHW cadres called *relais* and *bajenu gox* (“godmothers”) were  
234 critical to the success of the vaccination program. They sensitized communities several days  
235 before vaccine days and checked vaccination cards to assess whether children needed to attend  
236 upcoming events. In some cases, they called or texted parents to remind them of vaccination days.  
237 These CHWs provided extensive follow-up on dropouts, including door-to-door activities, and  
238 encouraged reluctant parents to vaccinate their children.

239  
240 *“The bajenu gox come to check if we are respecting the vaccination calendar, and if they*  
241 *notice any irregularities when they consult our booklet they ask us to go and catch up.”*  
242 *(Mother, Senegal)*

243  
244 Zambia utilizes Neighborhood Health Committees (NHCs) to dispel myths and misconceptions  
245 about vaccinations. NHCs are community-appointed volunteers whose primary role is to  
246 coordinate and supervise other Community Based Volunteers on behalf of the health facility staff;  
247 NHCs serve as the link between the health system and community [24]. Since NHCs are recruited  
248 by community leaders and work closely with leaders and MoH staff, they are a trusted source of  
249 information. NHCs also help coordinate general health service delivery, including community-  
250 level immunization services.

251  
252 *I think the myths and misconceptions was tackled through the interaction we were*  
253 *having with the NHCs. We came up with a program of meeting with the NHCs every*

254 *quarter, and meeting - we call them the “chilolo’s”, the headmen - twice per year to*  
255 *explain the importance of vaccines.” (District health official, Zambia)*

256 ***Community leaders, organizations, and religious figures***

257 Dissemination through community leaders proved impactful in all three countries as  
258 communities trusted the information source. Involvement from community leaders and  
259 community-based organizations were seen as critical to connect communities to the healthcare  
260 system, and community actors acted as gatekeepers to their communities. In Senegal, supportive  
261 community actors, including chiefs, village opinion leaders, neighborhood delegates, traditional  
262 birth attendants, marabouts (traditional doctors), and religious leaders (e.g., imams) conducted  
263 vaccination information sessions and followed-up with reluctant parents. Nepal has a similar type  
264 of community engagement, with traditional leaders, local leaders, FCHVs, religious figures, and  
265 teachers providing counsel and encouragement to parents. Community-led groups are present in  
266 both Senegal and Nepal, and are involved with immunization programming. This included  
267 promotion, service delivery, and targeted outreach, in addition to supporting equity and  
268 inclusivity by involving members from a variety of religious, ethnic, and socioeconomic groups.

269  
270 *We also involve religious leaders, as you say. The neighborhood delegates get involved*  
271 *in any case. It is all the leaders who can really help us to strengthen this communication*  
272 *and to raise awareness in relation to vaccination. So, it is according to the context of*  
273 *each area of responsibility, but everyone is involved - from the delegates to the mayors...*  
274 *There are a lot of strategies that are implemented in the districts, to reach the maximum*  
275 *of the community. (District health official, Senegal)*

276  
277 In Nepal, mothers are also connected to the health system through Mothers’ Health Groups  
278 (MHGs). MHGs are formed with the involvement of the community, local health institutions, and  
279 local governments, and consist of “all interested mothers of reproductive age” [25]. A discussion

280 topic is chosen as a group, with one FCHV facilitating. MHGs meet monthly and discuss various  
281 health topics, including immunizations. FCHVs conducted these meetings once a month; often on  
282 the same day as the immunization or outreach clinic [26]. Women in MHGs are tasked with  
283 sharing information from the meetings with other mothers in the community.

284  
285 *Basically, the Mothers' Group is responsible for giving education and information to the*  
286 *parents. We give and focus education and information on the mother rather than the*  
287 *father. If the mother knows about immunization camp, then the mother takes their baby*  
288 *in any condition or situation. FCHVs and Mothers' Group provide information regarding*  
289 *immunization activities or regular immunization programming. For new vaccines, it is*  
290 *discussed with FCHVs and mothers' group because, unless they support and are involved*  
291 *in the program, it won't be successful because they are the ones who are aware, give*  
292 *knowledge and information to the people at the grassroots level. (Former national level*  
293 *official, Nepal)*

294  
295 MoH officials in Zambia hold *indabas*, or formal community meetings, at least once per year at  
296 the provincial level. These meetings include all traditional and religious leaders in the area. The  
297 *indabas* were created in 2010 to educate community leaders on community health – including  
298 vaccinations – and to distribute relevant information to the community. Health facility staff meet  
299 with community leaders on an ad hoc basis; usually every 1-3 months. Leaders participate and  
300 have the opportunity to share challenges faced in their community, and suggest solutions.  
301 Meetings may also include planning and communication for upcoming activities (including Child  
302 Health Week), campaigns for the introduction of new vaccines, and notification of disease  
303 outbreaks. Upon completion of the *indabas*, the ministry and community leaders develop a plan  
304 to address health issues in their communities. Zambian community leaders then share  
305 information learned from *indabas* with their constituents. In addition, Zambia has been

306 particularly successful at leveraging social civil society organizations like the Churches Health  
307 Association of Zambia to help increase trust and participation in the immunization program [27].  
308 These organizations assist by providing information about vaccination programs and dispelling  
309 myths.

310  
311 *“At some point, we’ve even had some provincial Indabas where all the traditional leaders*  
312 *from almost all the districts are called to attend these meetings. So, it’s not something*  
313 *that is starting this year or started last year because I remember even as far back as*  
314 *2018 we had a meeting.... For key traditional leaders from across the province we meet*  
315 *with them .... in Mansa to discuss some of these issues. I know there were follow up*  
316 *meetings in the districts so it’s not starting now, it has always been a priority.” (District*  
317 *health official, Zambia)*

318

#### 319 **4. Discussion**

320 We conducted a qualitative study to assess interventions attributed to increased vaccine coverage  
321 by KIIs in Zambia, Nepal, and Senegal; the 5C model was then utilized to analyze the impact of  
322 the interventions on community vaccination behaviors. Our novel approach applied the 5C model  
323 by assessing the constructs at a population, rather than individual, level. This population level  
324 assessment of intent and demand for vaccine ultimately correlated to the model, illustrating that  
325 further use of the 5C’s may be useful for country-level stakeholders to determine wide-scale  
326 facilitators and barriers to vaccination.

327

328 We found *collective responsibility* to be the construct most correlated to demand generation in  
329 these countries. All studied countries exhibited cultural norms that related to *collective*  
330 *responsibility*, with participants from the community and health sector alike stressing the  
331 importance of the collective health of their communities. Vaccinations were considered critical to



332 children’s health by these populations, and in Nepal and Senegal, laws were codified to ensure all  
333 have access to vaccines; through codification, the governments legally confirmed the importance  
334 of community health and their responsibility in ensuring access [12, 13]. Although *collective*  
335 *responsibility* was the most prominent construct seen across the countries, interventions that  
336 utilized this construct may be the most difficult to replicate due to differences in culture and  
337 values. While ultimately similar, these community values arose through different means in Nepal  
338 and Senegal – but both countries are known to have strong social cohesion [28-31]. Countries  
339 with ‘tighter’ social cohesion were found to experience a ‘tipping point’ for norm change,  
340 compared to countries with ‘looser’ social cohesion that shows gradual change. This was seen  
341 during the COVID-19 pandemic, and Gelfand et al determined that countries with cultural  
342 ‘looseness’ had about 5 times the cases and 8.75 times the deaths than countries who had cultural  
343 ‘tightness’ and “abide by strict norms” [32]. Government initiatives from Zambia, Nepal, and  
344 Senegal focused on community engagement, involvement of local leaders, and targeted  
345 community messaging to operationalize existing social values and cohesion and to further  
346 increase intent and demand for vaccines.

347  
348 *Confidence* in the safety and efficacy of vaccines, providers, and the government at large fostered  
349 demand for vaccines in all three countries. Trust in vaccine efficacy was achieved through tangible  
350 decreases in morbidity and mortality witnessed by older generations who remembered the  
351 amount of disease present before vaccines were widely available. In Senegal, elderly women were  
352 specifically recruited for public awareness activities due to their unique and valuable perspectives.  
353 All three countries relied on trusted, volunteer, CHWs to improve *confidence* in service delivery  
354 by acting as a bridge to connect health staff to the people living in their catchment areas. CHWs  
355 are recognized as critical connections to the community, and provide culturally sensitive care and  
356 communication [33, 34]. When appropriately trained and supervised, CHWs in both LMIC and  
357 HIC contexts have been associated with improved health outcomes and accessibility to services

358 [35]. In addition to primary health education activities, they are mobilized to generate health  
359 service demand within underserved, low-income, indigenous, and marginalized populations [34-  
360 37]. Japan's government plays a leading role to recruit, train and recognize CHWs in the  
361 healthcare system [38]. However, due to a lack of formal training, CHWs in other HICs are often  
362 recruited on an ad-hoc basis by community-based organizations and trained on-the-job as  
363 temporary solutions to address health disparities [35, 36]. Similar to Senegal, elderly CHWs in  
364 Japan are specifically recruited for their homogeneity, trustworthiness, and years of experience  
365 in a community to increase overall involvement and effect of health promotion activities [39, 40].  
366 CHWs can be utilized to reach populations facing vaccination barriers and increase rates [41, 42].  
367 One recent study identified potential benefits of CHW-led interventions to increase influenza  
368 vaccination awareness among migrants and refugees in the United States [43]. The authors found  
369 multicomponent CHW-led interventions can increase vaccination knowledge and understanding,  
370 but further supports that health education must be provided by trusted community health  
371 members/CHWs and packaged with improved access to improve uptake [43]. Ultimately, these  
372 studies of CHWs in HICs show the utility in application of our findings throughout a multitude of  
373 settings.

374  
375 Not all constructs were directly transferrable at a population level as currently described in the 5C  
376 model. For example, population level demand had improved alignment with *constraints* once we  
377 separated it into two subcategories – physical *constraints* and psychological *constraints*. When  
378 looking at physical *constraints* separately, we determined that for some communities, access did  
379 not affect demand; in fact, parents' demand for vaccines was high enough to make physical  
380 barriers, such as traveling long distances or waiting long periods, worth pressing through to  
381 protect their children from diseases. We theorize this difference may be explained by the LMIC  
382 status of Nepal, Senegal, and Zambia, and recommend that further use of the 5C model in  
383 LIC/LMIC settings have the constraint construct separated into these distinct sub-categories.

384 Additionally, we hypothesize that communities with recent outbreaks or generational memory of  
385 vaccine preventable disease may make the choice to vaccinate regardless of physical *constraints*.  
386 Despite these differences, interventions targeted to 5C model constructs may provide ministries,  
387 program managers, and/or donors with evidence-based ways to increase demand - particularly in  
388 LICs/LMICs.

#### 389 **4.1 Application of our findings**

390 Our findings highlight that a population level assessment of the constructs in the 5C model can  
391 guide decision-makers in the creation - or adaptation - of interventions to increase intent and  
392 demand for childhood vaccines. Categorizing interventions by what drives demand may support  
393 strategic planning and influence the division of resources; policy makers may opt to ensure that  
394 demand generation activities cover all five constructs - increasing *confidence* and *collective*  
395 *responsibility* and addressing *complacency*, *constraints*, and *calculation*. Decision-makers may  
396 also use this assessment strategy to determine the individual impact of these constructs on the  
397 population, and focus their efforts on interventions that are tailored to a specific need. In Nepal,  
398 Senegal, and Zambia, we found that all five constructs were addressed through targeted  
399 education, media partnerships, CHW engagement, and buy-in from community and religious  
400 leaders - leading to generally high levels of demand, and ultimately vaccination coverage. From  
401 our work in Zambia, Nepal, and Senegal, we recommend the following strategies to target all 5C  
402 constructs and improve population-level demand:

- 403
- 404 1. Utilize existing community structures and consider cultural and social norms when  
405 designing interventions.
  - 406 2. Disseminate vaccine information through multiple trusted sources, such as CHWs,  
407 newspapers, radios, and religious leaders.
  - 408 3. Conduct school outreach by providing schoolteachers with lesson plans on health,  
409 including the importance of vaccination.

410 4. Assess physical and psychological constraints separately in LIC/LMIC settings and  
411 respond to each via tailored programming.

412

## 413 **5. Limitations**

414 There are several limitations to this study. First, the 5C model was created, validated, and mostly  
415 utilized, within HICs. Our research in LMICs mapped clearly to the model, which may make this  
416 applicable to population and systems levels; this is something that should be explored. Third, all  
417 countries had a cultural norm surrounding *collective responsibility*, therefore, these identified  
418 interventions may work best in similar cultures.

419

## 420 **6. Conclusion**

421 Demand for childhood vaccines was high among community members in countries with high and  
422 sustained coverage. Interventions used to generate demand –via raising public awareness and  
423 fostering community ownership of health– mapped onto the existing 5C psychological  
424 antecedents of vaccination framework. Utilizing theory-driven strategies like the 5C model may  
425 provide structure to community demand generation via identification of areas where additional  
426 interventions are needed to improve intent and demand. Interventions within Nepal, Senegal, and  
427 Zambia demonstrated fostering *confidence* and *collective responsibility* through a culture of  
428 community, while addressing barriers like physical and psychological *constraints*, *complacency*,  
429 and *calculation* with targeted education and messaging, alongside active community engagement.

430

## 431 **Acknowledgements:**

432 We thank the Center for Family Health Research in Zambia, the Center for Molecular Dynamics  
433 Nepal, along with Institut de Recherche en Santé de Surveillance Epidemiologique et de  
434 Formation in Dakar, Senegal. We gratefully acknowledge the participants who gave their time

435 and insights to help us better understand the vaccine delivery systems of Zambia, Nepal, and  
436 Senegal, along with facilitators from their respective Ministries of Health.

437

438 **Funding:**

439 This work was supported by the Bill & Melinda Gates Foundation, Seattle, WA (OPP1195041) with  
440 a planning grant from Gates Ventures, LLC, Kirkland, WA.

441

442 **Declaration of competing interests:**

443 The authors have no conflicts of interest to declare.

444

445 **Data statement:**

446 De-identified data are available upon request.

447

448  
449  
450  
451  
452  
453  
454  
455  
456  
457  
458  
459  
460  
461  
462  
463  
464  
465  
466  
467  
468  
469  
470  
471  
472

## References

1. Hwang, A., et al., *Global Vaccine Action Plan Lessons Learned II: Stakeholder Perspectives*. *Vaccine*, 2020. **38**(33): p. 5372-5378.
2. Cherian, T., et al., *Global Vaccine Action Plan lessons learned III: Monitoring and evaluation/accountability framework*. *Vaccine*, 2020. **38**(33): p. 5379-5383.
3. World Health Organization, *Diphtheria tetanus toxoid and pertussis (DTP3) immunization coverage among 1-year-olds (%)*. 2021, World Health Organization: Geneva.
4. Cooper, S., et al., *Vaccine hesitancy – a potential threat to the achievements of vaccination programmes in Africa*. *Human Vaccines & Immunotherapeutics*, 2018. **14**(10): p. 2355-2357.
5. MacDonald, N. and the SAGE Working Group on Vaccine Hesitancy, *Vaccine hesitancy: Definition, scope and determinants*. 2015.
6. World Health Organization, *Meeting of the Strategic Advisory Group of Experts on immunization, October 2014 – conclusions and recommendations*. 2014. p. 561-576.
7. Betsch, C., et al., *Beyond confidence: Development of a measure assessing the 5C psychological antecedents of vaccination*. *PLOS ONE*, 2018. **13**(12): p. e0208601.
8. Machida, M., et al., *Trends in COVID-19 vaccination intent from pre- to post-COVID-19 vaccine distribution and their associations with the 5C psychological antecedents of vaccination by sex and age in Japan*. *Human Vaccines & Immunotherapeutics*, 2021. **17**(11): p. 3954-3962.
9. Hossain, M.B., et al., *Health Belief Model, Theory of Planned Behavior, or Psychological Antecedents: What Predicts COVID-19 Vaccine Hesitancy Better Among the Bangladeshi Adults?* *Frontiers in Public Health*, 2021. **9**.

- 473 10. Nath, R., et al., *Role of Vaccine Hesitancy, eHealth Literacy, and Vaccine Literacy in*  
474 *Young Adults*&rsquo; *COVID-19 Vaccine Uptake Intention in a Lower-Middle-Income*  
475 *Country*. *Vaccines*, 2021. **9**(12): p. 1405.
- 476 11. Rodriguez, K., et al., *Critical success factors for routine immunization performance: A*  
477 *case study of Zambia 2000 to 2018*. medRxiv, 2021: p. 2021.11.30.21267060.
- 478 12. Sakas, Z., et al., *Critical success factors for high routine immunization performance: A*  
479 *case study of Senegal*. medRxiv, 2022: p. 2022.01.25.22269847.
- 480 13. Hester, K.A., et al., *Critical success factors for high routine immunization performance:*  
481 *A case study of Nepal*. medRxiv, 2022: p. 2022.01.28.22270023.
- 482 14. WHO, *Global Vaccine Action Plan 2011-2020*. 2013, World Health Organization: Geneva,  
483 Switzerland.
- 484 15. Bednarczyk, R.A., et al., *Protocol: Identification and evaluation of critical factors in*  
485 *achieving high and sustained childhood immunization coverage in selected low- and*  
486 *lower-middle income countries*. medRxiv, 2021: p. 2021.12.01.21267018.
- 487 16. Exemplars in Global Health. *Making Better Decisions in Global Health: Understand*  
488 *Positive Outliers to Inform Policy and Practice*. 2021; Available from:  
489 <https://www.exemplars.health/>.
- 490 17. Phillips, D.E., et al., *Determinants of effective vaccine coverage in low and middle-*  
491 *income countries: a systematic review and interpretive synthesis*. *BMC health services*  
492 *research*, 2017. **17**(1): p. 681-681.
- 493 18. LaFond, A., et al., *Drivers of routine immunization coverage improvement in Africa:*  
494 *findings from district-level case studies*. *Health policy and planning*, 2015. **30**(3): p. 298-  
495 308.
- 496 19. *Nepal Demographic Health Survey 2001, 2006, 2011, 2016, 2017*, DHS Program, Editor.

- 497 20. Pfadenhauer, L.M., et al., *Making sense of complexity in context and implementation: the*  
498 *Context and Implementation of Complex Interventions (CICI) framework.*  
499 *Implementation science : IS*, 2017. **12**(1): p. 21-21.
- 500 21. Hester K, *Open Sciences Framework (OSF) page: Exemplars in Vaccine Delivery.*  
501 [https://osf.io/7ys4a/?view\\_only=739ca7a72f9749118b4aa3d2f7b655d9](https://osf.io/7ys4a/?view_only=739ca7a72f9749118b4aa3d2f7b655d9)
- 502 22. Sthapit, N.M., *An inservice health education curriculum for primary teachers in Nepal.* .  
503 1979.
- 504 23. Nepal Ministry of Education and Sports, *Primary Education Curriculum 2063: Grade 1-*  
505 *3.* 2007.
- 506 24. Republic of Zambia Ministry of Health, *Zambia National Health Strategic Plan 2017-*  
507 *2021.*
- 508 25. Government of Nepal Ministry of Health and Population, *National Female Community*  
509 *Health Volunteer Program Strategy*, Family Health Division, Editor. 2007: Nepal.
- 510 26. Rajbhandari S, H.S., Sanghvi H, McPherson R, Pradhan YV, Baqui AH, *Expanding*  
511 *uterotonic protection following childbirth through community-based distribution of*  
512 *misoprostol: Operations research study in Nepal.* *Int J Gynaecol Obstet*, 2009.
- 513 27. Churches Health Association of Zambia. *Churches Health Association of Zambia: About*  
514 *CHAZ.* Available from: <https://www.chaz.org.zm/about-chaz/>.
- 515 28. Gilligan, M.J., B.J. Pasquale, and C. Samii, *Civil War and Social Cohesion: Lab-in-the-*  
516 *Field Evidence from Nepal.* *American Journal of Political Science*, 2014. **58**(3): p. 604-  
517 619.
- 518 29. Munroe, R.L., *Altruism and Collectivism: An Exploratory Study in Four Cultures.* *Cross-*  
519 *Cultural Research*, 2017. **52**(3): p. 334-345.
- 520 30. Wilfahrt, M., *The politics of local government performance: Elite cohesion and cross-*  
521 *village constraints in decentralized Senegal.* *World Development*, 2018. **103**: p. 149-161.



- 522 31. De, S., et al. *Tipping Points for Norm Change in Human Cultures*. in *Social, Cultural, and*  
523 *Behavioral Modeling*. 2018. Cham: Springer International Publishing.
- 524 32. Gelfand, M., et al., *The relationship between cultural tightness-looseness and COVID-19*  
525 *cases and deaths: a global analysis*. *The Lancet Planetary Health*, 2021. **5**.
- 526 33. Glenton, C., D. Javadi, and H.B. Perry, *Community health workers at the dawn of a new*  
527 *era: 5. Roles and tasks*. *Health Research Policy and Systems*, 2021. **19**(3): p. 128.
- 528 34. Javanparast, S., et al., *Community Health Worker Programs to Improve Healthcare*  
529 *Access and Equity: Are They Only Relevant to Low- and Middle-Income Countries?*  
530 *International journal of health policy and management*, 2018. **7**(10): p. 943-954.
- 531 35. Perry, H.B., R. Zulliger, and M.M. Rogers, *Community Health Workers in Low-, Middle-*  
532 *, and High-Income Countries: An Overview of Their History, Recent Evolution, and*  
533 *Current Effectiveness*. *Annual Review of Public Health*, 2014. **35**(1): p. 399-421.
- 534 36. Najafizada, S.A.M.M.D., et al., *Community health workers in Canada and other high-*  
535 *income countries: A scoping review and research gaps*. *Canadian Journal of Public*  
536 *Health*, 2015. **106**(3): p. E157-E164.
- 537 37. Ospina, J.E., et al., *Community health workers improve contact tracing among*  
538 *immigrants with tuberculosis in Barcelona*. *BMC Public Health*, 2012. **12**(1): p. 158.
- 539 38. Taguchi, A., et al., *Recruiting, trianing, and supporting community based health*  
540 *promotion volunteers in Japan: findings from a national survey*, in *146th American*  
541 *Public Health Association Annual Meeting & Exposition 2018*: San Diego. p. 10-14.
- 542 39. Murayama, H., A. Taguchi, and S. Murashima, *Differences in Psychosocial Factors*  
543 *Among Novice, Experienced, and Veteran Health Promotion Volunteers in Japan*. *Public*  
544 *Health Nursing*, 2008. **25**(3): p. 253-260.
- 545 40. Murayama, H., A. Taguchi, and S. Murashima, *Does Similarity in Educational Level*  
546 *Between Health Promotion Volunteers and Local Residents Affect Activity Involvement*  
547 *of the Volunteers?* *Public Health Nursing*, 2012. **29**(1): p. 36-43.

- 548 41. Malik, M.N., M.S. Awan, and T. Saleem, *Social mobilization campaign to tackle*  
549 *immunization hesitancy in Sargodha and Khushab districts of Pakistan*. Journal of global  
550 health, 2020. **10**(2): p. 021302-021302.
- 551 42. Rahman, R., A. Ross, and R. Pinto, *The critical importance of community health workers*  
552 *as first responders to COVID-19 in USA*. Health promotion international, 2021. **36**(5): p.  
553 1498-1507.
- 554 43. Ponce-Gonzalez, I.M., et al., *A Multicomponent Health Education Campaign Led by*  
555 *Community Health Workers to Increase Influenza Vaccination among Migrants and*  
556 *Refugees*. Journal of primary care & community health, 2021. **12**: p. 21501327211055627-  
557 21501327211055627.
- 558

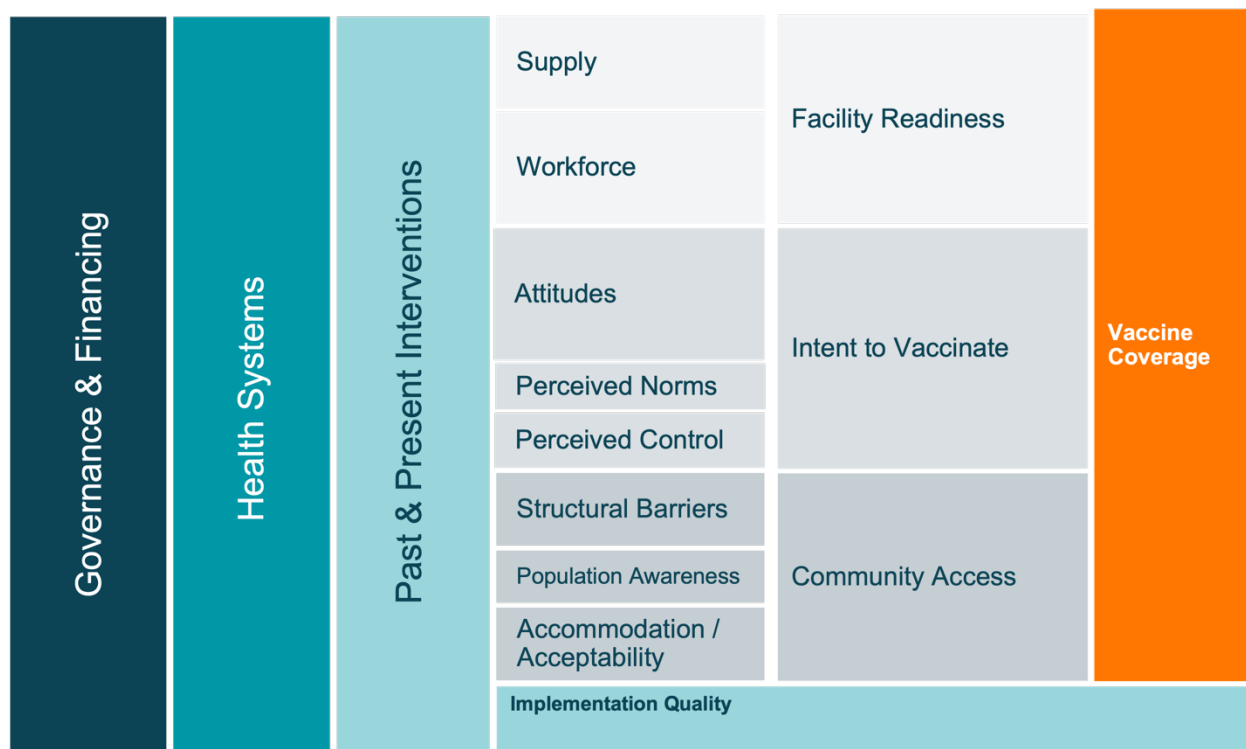

**Figure 1. Conceptual model of the drivers of vaccine coverage.**

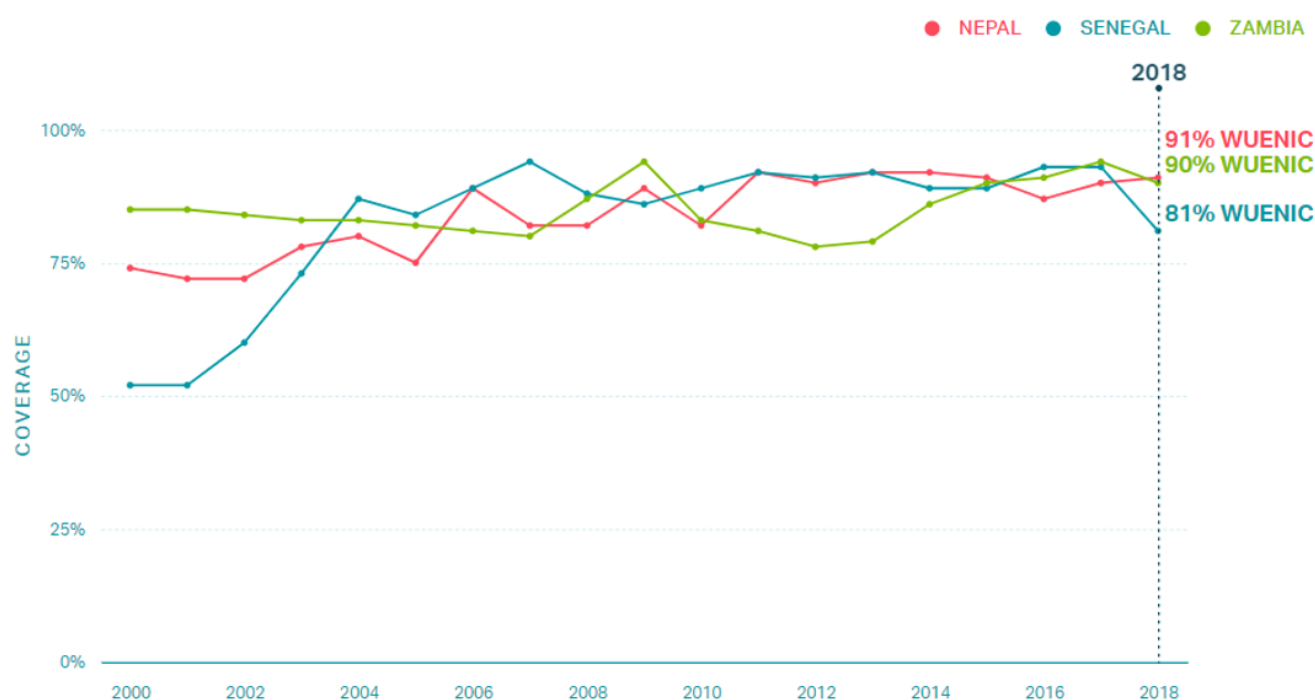

**Figure 2. DTP3 coverage of Zambia, Nepal, and Senegal from 2000 to 2018; WUENIC data**

| Country | Region          | District                          |
|---------|-----------------|-----------------------------------|
| Zambia  | Lusaka          | Lusaka, Rufunsa, Chongwe          |
|         | Central         | Chibombo, Chitambo, Serenje       |
|         | Luapula         | Chipili, Nchelenge, Samfya        |
| Nepal   | Madhes          | Dhanusha, Bara, Mahottari         |
|         | Bagmati         | Makwanpur, Dolakha, Kathmandu     |
|         | Gandaki Pradesh | Kaski, Myagdi, Nawalparasi        |
| Senegal | Ziguinchor      | Ziguinchor, Oussouye, Diouloulou  |
|         | Dakar           | Rufisque, Mbao, Keur Massar       |
|         | Tambacounda     | Tambacounda, Koumpentoum, Goudiry |

**Table 1: Summary of countries, regions, and districts selected for research**

|                                           | Nepal           | Senegal         | Zambia          |
|-------------------------------------------|-----------------|-----------------|-----------------|
| <b>Interviews</b>                         |                 |                 |                 |
| <i>Key: Number of KIIs (Participants)</i> | <b>79 (79)</b>  | <b>63 (63)</b>  | <b>66 (85)</b>  |
| National level government staff           | 11 (11)         | 5 (5)           | 11 (12)         |
| Partner organization staff                | 8 (8)           | 4 (4)           | 11 (15)         |
| Regional health staff                     | 14 (14)         | 7 (7)           | 6 (8)           |
| District health staff                     | 15 (15)         | 38 (38)         | 10 (19)         |
| Health facility staff                     | 10 (10)         | 6 (6)           | 7 (10)          |
| Community leaders                         | 15 (15)         | 2 (2)           | 10 (10)         |
| Community health workers *                | 9 (9)           | -               | 11 (11)         |
| <b>Focus Groups</b>                       |                 |                 |                 |
| <i>Key: Number of FGDs (participants)</i> | <b>30 (191)</b> | <b>19 (128)</b> | <b>22 (132)</b> |
| Community health workers *                | 9 (60)          | 10 (65)         | 10 (60)         |
| Mothers                                   | 9 (60)          | 9 (63)          | 8 (48)          |
| Fathers                                   | 6 (36)          | -               | 1 (6)           |
| Grandparents                              | 6 (35)          | -               | 3 (18)          |

\*Includes volunteer community health workers, female community health volunteers (FCHV), vaccinators, bajenu gox, and neighborhood health committee members.

**Table 2: Summary of data collection activities**

| Construct                        | Definition                                                                                                                                                                                                                                                                                                                                  |
|----------------------------------|---------------------------------------------------------------------------------------------------------------------------------------------------------------------------------------------------------------------------------------------------------------------------------------------------------------------------------------------|
| <i>Confidence</i>                | “Trust in (i) the effectiveness and safety of vaccines, (ii) the system that delivers them, including the reliability and competence of the health services and health professionals, and (iii) the motivations of policy-makers who decide on the need of vaccines [5].”                                                                   |
| <i>Collective responsibility</i> | “The willingness to protect others by one’s own vaccination by means of herd immunity. The flip side is the willingness to free ride when enough others are vaccinated. Collective responsibility should correlate positively with collectivism, communal orientation, and empathy. It should correlate negatively with individualism [7].” |
| <i>Complacency</i>               | “Perceived risks of vaccine-preventable diseases are low and vaccination is not deemed a necessary preventive action [5].”                                                                                                                                                                                                                  |
| <i>Constraints</i>               | Physical constraints include the “physical availability, affordability and willingness-to-pay, geo- graphical accessibility, ability to understand (language and health literacy) and appeal of immunization service affect uptake [5].”<br><br>Psychological constraints deal with access and “a lack of perceived control [7].”           |
| <i>Calculation</i>               | “Individuals’ engagement in extensive information searching. We assume that individuals high in calculation evaluate risks of infections and vaccination to derive a good decision [7].”                                                                                                                                                    |

**Table 3. 5C psychological antecedents of vaccination scale constructs and definitions**

Commented [HKAI]: @Yang, Chenmu can you add citation #7 here?

| Construct*                                                                                                          | Correlation | Nepali context                                                                                                                                                                                                                                                                                                                                                       | Zambian context                                                                                                                                                                                                                                                                                                                                                                                              | Senegalese context                                                                                                                                                                                                                                                                                                                                                                                                             |
|---------------------------------------------------------------------------------------------------------------------|-------------|----------------------------------------------------------------------------------------------------------------------------------------------------------------------------------------------------------------------------------------------------------------------------------------------------------------------------------------------------------------------|--------------------------------------------------------------------------------------------------------------------------------------------------------------------------------------------------------------------------------------------------------------------------------------------------------------------------------------------------------------------------------------------------------------|--------------------------------------------------------------------------------------------------------------------------------------------------------------------------------------------------------------------------------------------------------------------------------------------------------------------------------------------------------------------------------------------------------------------------------|
| <b>Confidence</b><br><br><i>Trust in vaccines, the health system, and the motivations of policy makers.</i>         | Positive    | Trust in government and media information on vaccines, as well as vaccines themselves; perceived reductions in outbreaks, disease, disability; some refusal among religious groups, caste, ethnicity, etc.<br><br><b>Interventions:</b><br><i>FCHWs for community level health information; education via FCHVs/CHWs, schools, media; Media partnership with MoH</i> | General community trust in vaccines; some distrust and misinformation seen that communities address directly<br><br><b>Interventions:</b><br><i>CHWs for community level health information; Education via CHWs, schools, media; Media partnership with MoH; 'Indabas' meetings with local leaders</i>                                                                                                       | Parents trust vaccines; some rumors surrounding vaccines and infertility, side effects, and adverse events, which are addressed via government guidelines<br><br><b>Interventions:</b><br><i>CHWs for community level health information; Education via CHWs, schools, media; Media partnership with MoH; Guidelines to address rumors at different levels</i>                                                                 |
| <b>Collective Responsibility</b><br><br><i>A willingness to protect others.</i>                                     | Positive    | Strong community ties and empathy as a cultural value; health as a human right. Codified into law<br><br><b>Interventions:</b><br><i>FCHVs /CHWs for community level health information; codification of health as a human right; Education via FCHVs/CHWs, schools, media</i>                                                                                       | Widespread community involvement. Community is encouraged to report any challenges for government to respond/fix<br><br><b>Interventions:</b><br><i>CHWs for community level health information and education; 'Indabas' meetings with local/traditional leaders</i>                                                                                                                                         | Health as a human right; strong community ownership of health outcomes and vaccine programming<br><br><b>Interventions:</b><br><i>CHWs for community level health information and education; Education via FCHVs/CHWs, schools, media; Community leader, committee, and CBO engagement</i>                                                                                                                                     |
| <b>Complacency</b><br><br><i>Risk of disease is seen as low; vaccines are believed to be unnecessary.</i>           | Negative    | Parents perceive a high risk from vaccine-preventable disease. Active pursuit of vaccination among most communities<br><br><b>Interventions:</b><br><i>Education via FCHVs/CHWs, schools, media; set days and locations for vaccination</i>                                                                                                                          | Vaccines are seen as important and necessary in reducing morbidity and mortality; Outbreaks occurred recently, showing the risk of disease<br><br><b>Interventions:</b><br><i>Education via CHWs, schools, media; local laws</i>                                                                                                                                                                             | Parents understand the risk of infectious disease and the importance of vaccines; some outbreaks occurred in border communities<br><br><b>Interventions:</b><br><i>Education via CHWs, schools, media</i>                                                                                                                                                                                                                      |
| <b>Constraints</b><br><br><i>Structural and psychological barriers create difficulties with accessing vaccines.</i> | Negative    | Easy access to vaccines; religious and cultural leaders promote vaccination. Constraints may vary by geography, particularly those in hard-to-reach mountainous areas or during the rainy season<br><br><b>Interventions:</b><br><i>Set days and locations for vaccination days; supply chain improvements; health post expansion</i>                                | Barriers include long distances to health facilities and competing priorities; constraints may vary by geography and region but do not always affect uptake as parents will sometimes persist through barriers to ensure child is vaccinated<br><br><b>Interventions:</b><br><i>Supply chain improvements; health post expansion; context specific adaptability to community availability in rural areas</i> | Constraints differ by province and geography – includes long distances to health facilities, poor transportation, and poor infrastructure. Does not always negatively affect uptake; parents sometimes persist through barriers to ensure childhood vaccination<br><br><b>Interventions:</b><br><i>Context specific adaptability to community availability in rural areas supply chain improvements; health post expansion</i> |
| <b>Calculation</b><br><br><i>Uncertainty, information searching, and cost-benefit calculations.</i>                 | Negative    | High trust in government and vaccine information; FCHVs are highly regarded community members<br><br><b>Interventions:</b><br><i>FCHVs for community level health information; Media partnership with MoH; Education via FCHVs/CHWs, schools, media; online news portal</i>                                                                                          | Believe and trust in information provided by government and community-based organizations<br><br><b>Interventions:</b><br><i>CHWs for community level health information; Media partnership with MoH; Education via CHWs, schools, media</i>                                                                                                                                                                 | Trust in media and government; may differ by province and social media use<br><br><b>Interventions:</b><br><i>CHWs for community level health information; Association of Journalists Media Partnership; press caravans</i>                                                                                                                                                                                                    |

\* Definitions adapted from Betsch et. al. 5C psychological antecedents of vaccination constructs

**Table 4. Application of the 5C model to Nepali, Zambian, and Senegalese context with the associated interventions utilized to raise demand**
